# Supplementary material for: Reactogenicity of BNT162b2 mRNA COVID-19 Vaccine in a Young Working Age Population: A Survey among Medical School Residents, within a Mass Vaccination Campaign, in a Regional Reference Teaching Hospital in Italy
Source: MDPI journal article supplement (doi:10.3390/vaccines9111269), 2021-11-03
Supplement: s1 [file s1]

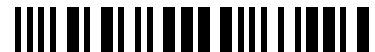

**Questo questionario è finalizzato a indagare le reazioni locali e sistemiche della vaccinazione mRNA COVID-19. Si prega il partecipante di compilare con attenzione il questionario nei 7 giorni a partire da quello della vaccinazione. Questi dati sono molto importanti in ambito di ricerca applicata durante la campagna vaccinale in Italia.**

**Si prega di compilare il questionario giornalmente, e di selezionare una sola risposta per ogni giorno. Il questionario può essere salvato, ripreso e modificato fino all'invio da parte del partecipante o alla scadenza prevista.**

## Sezione A: Sezione 1 - Anagrafica

**A1. Nome e Cognome**

**A2. Genere**

Femminile ☐

Maschile ☐

Non-binario ☐

**A3. Età**

## Sezione B: Sezione 2 - Vaccino COVID-19 mRNA: EFFETTI LOCALI

**B1.**

**Hai avuto arrossamento in sede di iniezione?**

**Giorno 1**

*Lieve: >2,0 a 5,0 cm; moderato: >5,0 a 10,0 cm; grave: >10,0 cm; grado 4: necrosi o dermatite esfoliativa*

Grado 4 ☐

Grave ☐

Moderato ☐

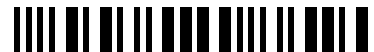
Lieve ☐

Nessuno ☐
**B2.**
**Hai avuto arrossamento in sede di iniezione?**
**Giorno 2**
*Lieve: >2,0 a 5,0 cm; moderato: >5,0 a 10,0 cm; grave: >10,0 cm; grado 4: necrosi o dermatite esfoliativa*

Grado 4 ☐

Grave ☐

Moderato ☐

Lieve ☐

Nessuno ☐
**B3.**
**Hai avuto arrossamento in sede di iniezione?**
**Giorno 3**
*Lieve: >2,0 a 5,0 cm; moderato: >5,0 a 10,0 cm; grave: >10,0 cm; grado 4: necrosi o dermatite esfoliativa*

Grado 4 ☐

Grave ☐

Moderato ☐

Lieve ☐

Nessuno ☐
**B4.**
**Hai avuto arrossamento in sede di iniezione?**
**Giorno 4**
*Lieve: >2,0 a 5,0 cm; moderato: >5,0 a 10,0 cm; grave: >10,0 cm; grado 4: necrosi o dermatite esfoliativa*

Grado 4 ☐

Grave ☐

Moderato ☐

Lieve ☐

Nessuno ☐

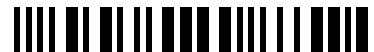

**B5.**

**Hai avuto arrossamento in sede di iniezione?**

**Giorno 5**

*Lieve: >2,0 a 5,0 cm; moderato: >5,0 a 10,0 cm; grave: >10,0 cm; grado 4: necrosi o dermatite esfoliativa*

Grado 4 ☐

Grave ☐

Moderato ☐

Lieve ☐

Nessuno ☐

**B6.**

**Hai avuto arrossamento in sede di iniezione?**

**Giorno 6**

*Lieve: >2,0 a 5,0 cm; moderato: >5,0 a 10,0 cm; grave: >10,0 cm; grado 4: necrosi o dermatite esfoliativa*

Grado 4 ☐

Grave ☐

Moderato ☐

Lieve ☐

Nessuno ☐

**B7.**

**Hai avuto arrossamento in sede di iniezione?**

**Giorno 7**

*Lieve: >2,0 a 5,0 cm; moderato: >5,0 a 10,0 cm; grave: >10,0 cm; grado 4: necrosi o dermatite esfoliativa*

Grado 4 ☐

Grave ☐

Moderato ☐

Lieve ☐

Nessuno ☐

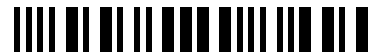

**B8.**

**Hai avuto gonfiore in sede di iniezione?**

**Giorno 1**

*Lieve: >2,0 a 5,0 cm; moderato: >5,0 a 10,0 cm; grave: >10,0 cm; grado 4: necrosi*

Grado 4 ☐

Grave ☐

Moderato ☐

Lieve ☐

Nessuno ☐

**B9.**

**Hai avuto gonfiore in sede di iniezione?**

**Giorno 2**

*Lieve: >2,0 a 5,0 cm; moderato: >5,0 a 10,0 cm; grave: >10,0 cm; grado 4: necrosi*

Grado 4 ☐

Grave ☐

Moderato ☐

Lieve ☐

Nessuno ☐

**B10.**

**Hai avuto gonfiore in sede di iniezione?**

**Giorno 3**

*Lieve: >2,0 a 5,0 cm; moderato: >5,0 a 10,0 cm; grave: >10,0 cm; grado 4: necrosi*

Grado 4 ☐

Grave ☐

Moderato ☐

Lieve ☐

Nessuno ☐

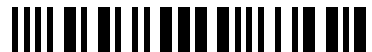

**B11.**

**Hai avuto gonfiore in sede di iniezione?**

**Giorno 4**

*Lieve: >2,0 a 5,0 cm; moderato: >5,0 a 10,0 cm; grave: >10,0 cm; grado 4: necrosi*

Grado 4 ☐

Grave ☐

Moderato ☐

Lieve ☐

Nessuno ☐

**B12.**

**Hai avuto gonfiore in sede di iniezione?**

**Giorno 5**

*Lieve: >2,0 a 5,0 cm; moderato: >5,0 a 10,0 cm; grave: >10,0 cm; grado 4: necrosi*

Grado 4 ☐

Grave ☐

Moderato ☐

Lieve ☐

Nessuno ☐

**B13.**

**Hai avuto gonfiore in sede di iniezione?**

**Giorno 6**

*Lieve: >2,0 a 5,0 cm; moderato: >5,0 a 10,0 cm; grave: >10,0 cm; grado 4: necrosi*

Grado 4 ☐

Grave ☐

Moderato ☐

Lieve ☐

Nessuno ☐

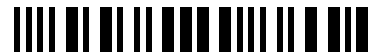

**B14.**

**Hai avuto gonfiore in sede di iniezione?**

**Giorno 7**

*Lieve: >2,0 a 5,0 cm; moderato: >5,0 a 10,0 cm; grave: >10,0 cm; grado 4: necrosi*

Grado 4 ☐

Grave ☐

Moderato ☐

Lieve ☐

Nessuno ☐

**B15.**

**Hai avuto dolore in sede di iniezione?**

**Giorno 1**

*Lieve: non interferisce con l'attività; moderato: interferisce con l'attività; grave: impedisce l'attività quotidiana; grado 4: visita al pronto soccorso o ricovero in ospedale per forte dolore al sito di iniezione.*

Grado 4 ☐

Grave ☐

Moderato ☐

Lieve ☐

Nessuno ☐

**B16.**

**Hai avuto dolore in sede di iniezione?**

**Giorno 2**

*Lieve: non interferisce con l'attività; moderato: interferisce con l'attività; grave: impedisce l'attività quotidiana; grado 4: visita al pronto soccorso o ricovero in ospedale per forte dolore al sito di iniezione.*

Grado 4 ☐

Grave ☐

Moderato ☐

Lieve ☐

Nessuno ☐

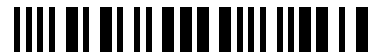

**B17.**

### Hai avuto dolore in sede di iniezione?

#### Giorno 3

*Lieve: non interferisce con l'attività; moderato: interferisce con l'attività; grave: impedisce l'attività quotidiana; grado 4: visita al pronto soccorso o ricovero in ospedale per forte dolore al sito di iniezione.*

Grado 4 ☐

Grave ☐

Moderato ☐

Lieve ☐

Nessuno ☐

**B18.**

### Hai avuto dolore in sede di iniezione?

#### Giorno 4

*Lieve: non interferisce con l'attività; moderato: interferisce con l'attività; grave: impedisce l'attività quotidiana; grado 4: visita al pronto soccorso o ricovero in ospedale per forte dolore al sito di iniezione.*

Grado 4 ☐

Grave ☐

Moderato ☐

Lieve ☐

Nessuno ☐

**B19.**

### Hai avuto dolore in sede di iniezione?

#### Giorno 5

*Lieve: non interferisce con l'attività; moderato: interferisce con l'attività; grave: impedisce l'attività quotidiana; grado 4: visita al pronto soccorso o ricovero in ospedale per forte dolore al sito di iniezione.*

Grado 4 ☐

Grave ☐

Moderato ☐

Lieve ☐

Nessuno ☐

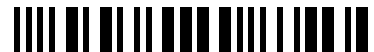

**B20.**

**Hai avuto dolore in sede di iniezione?**

**Giorno 6**

*Lieve: non interferisce con l'attività; moderato: interferisce con l'attività; grave: impedisce l'attività quotidiana; grado 4: visita al pronto soccorso o ricovero in ospedale per forte dolore al sito di iniezione.*

Grado 4 ☐

Grave ☐

Moderato ☐

Lieve ☐

Nessuno ☐

**B21.**

**Hai avuto dolore in sede di iniezione?**

**Giorno 7**

*Lieve: non interferisce con l'attività; moderato: interferisce con l'attività; grave: impedisce l'attività quotidiana; grado 4: visita al pronto soccorso o ricovero in ospedale per forte dolore al sito di iniezione.*

Grado 4 ☐

Grave ☐

Moderato ☐

Lieve ☐

Nessuno ☐

## Sezione C: Sezione 2 - Vaccino COVID-19 mRNA: EFFETTI SISTEMICI

**C1.**

**Hai avuto febbre?**

**Giorno 1**

>40,0°C ☐

>39,0°C a 40,0°C ☐

>38,5°C a 39,0°C ☐

>38,0°C a 38,5°C ☐

≥37,5°C a 38,0°C ☐

No ☐



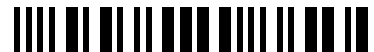

**C2.**

**Hai avuto febbre?**

**Giorno 2**

- >40,0°C ☐
- >39,0°C a 40,0°C ☐
- >38,5°C a 39,0°C ☐
- >38,0°C a 38,5°C ☐
- ≥37,5°C a 38,0°C ☐
- No ☐

**C3.**

**Hai avuto febbre?**

**Giorno 3**

- >40,0°C ☐
- >39,0°C a 40,0°C ☐
- >38,5°C a 39,0°C ☐
- >38,0°C a 38,5°C ☐
- ≥37,5°C a 38,0°C ☐
- No ☐

**C4.**

**Hai avuto febbre?**

**Giorno 4**

- >40,0°C ☐
- >39,0°C a 40,0°C ☐
- >38,5°C a 39,0°C ☐
- >38,0°C a 38,5°C ☐
- ≥37,5°C a 38,0°C ☐
- No ☐

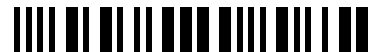

**C5.**

**Hai avuto febbre?**

**Giorno 5**

- >40,0°C ☐
- >39,0°C a 40,0°C ☐
- >38,5°C a 39,0°C ☐
- >38,0°C a 38,5°C ☐
- ≥37,5°C a 38,0°C ☐
- No ☐

**C6.**

**Hai avuto febbre?**

**Giorno 6**

- >40,0°C ☐
- >39,0°C a 40,0°C ☐
- >38,5°C a 39,0°C ☐
- >38,0°C a 38,5°C ☐
- ≥37,5°C a 38,0°C ☐
- No ☐

**C7.**

**Hai avuto febbre?**

**Giorno 7**

- >40,0°C ☐
- >39,0°C a 40,0°C ☐
- >38,5°C a 39,0°C ☐
- >38,0°C a 38,5°C ☐
- ≥37,5°C a 38,0°C ☐
- No ☐

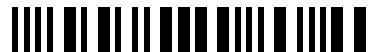

C8.

### Hai avuto astenia?

#### Giorno 1

*Lieve: non interferisce con l'attività; moderato: una limitata interferenza con l'attività; grave: impedisce l'attività quotidiana; grado 4: visita al pronto soccorso o ricovero in ospedale per grave affaticamento*

Nessuno ☐

Lieve ☐

Moderato ☐

Grave ☐

Grado 4 ☐

C9.

### Hai avuto astenia?

#### Giorno 2

*Lieve: non interferisce con l'attività; moderato: una limitata interferenza con l'attività; grave: impedisce l'attività quotidiana; grado 4: visita al pronto soccorso o ricovero in ospedale per grave affaticamento*

Nessuno ☐

Lieve ☐

Moderato ☐

Grave ☐

Grado 4 ☐

C10.

### Hai avuto astenia?

#### Giorno 3

*Lieve: non interferisce con l'attività; moderato: una limitata interferenza con l'attività; grave: impedisce l'attività quotidiana; grado 4: visita al pronto soccorso o ricovero in ospedale per grave affaticamento*

Nessuno ☐

Lieve ☐

Moderato ☐

Grave ☐

Grado 4 ☐

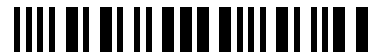

**C11.**

**Hai avuto astenia?**

**Giorno 4**

*Lieve: non interferisce con l'attività; moderato: una limitata interferenza con l'attività; grave: impedisce l'attività quotidiana; grado 4: visita al pronto soccorso o ricovero in ospedale per grave affaticamento*

Nessuno ☐

Lieve ☐

Moderato ☐

Grave ☐

Grado 4 ☐

**C12.**

**Hai avuto astenia?**

**Giorno 5**

*Lieve: non interferisce con l'attività; moderato: una limitata interferenza con l'attività; grave: impedisce l'attività quotidiana; grado 4: visita al pronto soccorso o ricovero in ospedale per grave affaticamento*

Nessuno ☐

Lieve ☐

Moderato ☐

Grave ☐

Grado 4 ☐

**C13.**

**Hai avuto astenia?**

**Giorno 6**

*Lieve: non interferisce con l'attività; moderato: una limitata interferenza con l'attività; grave: impedisce l'attività quotidiana; grado 4: visita al pronto soccorso o ricovero in ospedale per grave affaticamento*

Nessuno ☐

Lieve ☐

Moderato ☐

Grave ☐

Grado 4 ☐

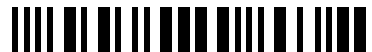

**C14.**

**Hai avuto astenia?**

**Giorno 7**

*Lieve: non interferisce con l'attività; moderato: una limitata interferenza con l'attività; grave: impedisce l'attività quotidiana; grado 4: visita al pronto soccorso o ricovero in ospedale per grave affaticamento*

Nessuno ☐

Lieve ☐

Moderato ☐

Grave ☐

Grado 4 ☐

**C15.**

**Hai avuto brividi?**

**Giorno 1**

No ☐

Sì ☐

**C16.**

**Hai avuto brividi?**

**Giorno 2**

No ☐

Sì ☐

**C17.**

**Hai avuto brividi?**

**Giorno 3**

No ☐

Sì ☐

**C18.**

**Hai avuto brividi?**

**Giorno 4**

No ☐

Sì ☐

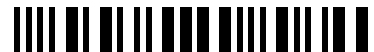

**C19.**

**Hai avuto brividi?**

**Giorno 5**

No ☐

Sì ☐

**C20.**

**Hai avuto brividi?**

**Giorno 6**

No ☐

Sì ☐

**C21.**

**Hai avuto brividi?**

**Giorno 7**

No ☐

Sì ☐

**C22.**

**Hai avuto cefalea?**

**Giorno 1**

*Lieve: non interferisce con l'attività; moderato: una limitata interferenza con l'attività; grave: impedisce l'attività quotidiana; grado 4: visita al pronto soccorso o ricovero in ospedale per forte mal di testa*

Grado 4 ☐

Grave ☐

Moderato ☐

Lieve ☐

Nessuno ☐

**C23.**

**Hai avuto cefalea?**

**Giorno 2**

*Lieve: non interferisce con l'attività; moderato: una limitata interferenza con l'attività; grave: impedisce l'attività quotidiana; grado 4: visita al pronto soccorso o ricovero in ospedale per forte mal di testa*

Grado 4 ☐

Grave ☐

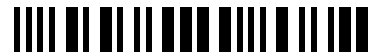
Moderato ☐

Lieve ☐

Nessuno ☐
**C24.**
**Hai avuto cefalea?**
**Giorno 3**

*Lieve: non interferisce con l'attività; moderato: una limitata interferenza con l'attività; grave: impedisce l'attività quotidiana; grado 4: visita al pronto soccorso o ricovero in ospedale per forte mal di testa*

Grado 4 ☐

Grave ☐

Moderato ☐

Lieve ☐

Nessuno ☐
**C25.**
**Hai avuto cefalea?**
**Giorno 4**

*Lieve: non interferisce con l'attività; moderato: una limitata interferenza con l'attività; grave: impedisce l'attività quotidiana; grado 4: visita al pronto soccorso o ricovero in ospedale per forte mal di testa*

Grado 4 ☐

Grave ☐

Moderato ☐

Lieve ☐

Nessuno ☐
**C26.**
**Hai avuto cefalea?**
**Giorno 5**

*Lieve: non interferisce con l'attività; moderato: una limitata interferenza con l'attività; grave: impedisce l'attività quotidiana; grado 4: visita al pronto soccorso o ricovero in ospedale per forte mal di testa*

Grado 4 ☐

Grave ☐

Moderato ☐

Lieve ☐

Nessuno ☐

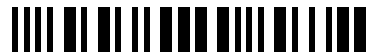

**C27.**

### Hai avuto cefalea?

#### Giorno 6

*Lieve: non interferisce con l'attività; moderato: una limitata interferenza con l'attività; grave: impedisce l'attività quotidiana; grado 4: visita al pronto soccorso o ricovero in ospedale per forte mal di testa*

Grado 4 ☐

Grave ☐

Moderato ☐

Lieve ☐

Nessuno ☐

**C28.**

### Hai avuto cefalea?

#### Giorno 7

*Lieve: non interferisce con l'attività; moderato: una limitata interferenza con l'attività; grave: impedisce l'attività quotidiana; grado 4: visita al pronto soccorso o ricovero in ospedale per forte mal di testa*

Grado 4 ☐

Grave ☐

Moderato ☐

Lieve ☐

Nessuno ☐

**C29.**

### Hai avuto mialgie/artralgie?

#### Giorno 1

*Lieve: non interferisce con l'attività; moderato: una limitata interferenza con l'attività; grave: impedisce l'attività quotidiana; grado 4: visita al pronto soccorso o ricovero in ospedale per forte dolore muscolare o forte dolore alle articolazioni*

Lieve ☐

Nessuno ☐

Grado 4 ☐

Grave ☐

Moderato ☐



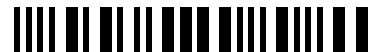

**C30.**

**Hai avuto mialgie/artralgie?**

**Giorno 2**

*Lieve: non interferisce con l'attività; moderato: una limitata interferenza con l'attività; grave: impedisce l'attività quotidiana; grado 4: visita al pronto soccorso o ricovero in ospedale per forte dolore muscolare o forte dolore alle articolazioni*

Lieve ☐

Nessuno ☐

Grado 4 ☐

Grave ☐

Moderato ☐

**C31.**

**Hai avuto mialgie/artralgie?**

**Giorno 3**

*Lieve: non interferisce con l'attività; moderato: una limitata interferenza con l'attività; grave: impedisce l'attività quotidiana; grado 4: visita al pronto soccorso o ricovero in ospedale per forte dolore muscolare o forte dolore alle articolazioni*

Lieve ☐

Nessuno ☐

Grado 4 ☐

Grave ☐

Moderato ☐

**C32.**

**Hai avuto mialgie/artralgie?**

**Giorno 4**

*Lieve: non interferisce con l'attività; moderato: una limitata interferenza con l'attività; grave: impedisce l'attività quotidiana; grado 4: visita al pronto soccorso o ricovero in ospedale per forte dolore muscolare o forte dolore alle articolazioni*

Lieve ☐

Nessuno ☐

Grado 4 ☐

Grave ☐

Moderato ☐

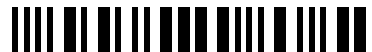

**C33.**

### Hai avuto mialgie/artralgie?

#### Giorno 5

*Lieve: non interferisce con l'attività; moderato: una limitata interferenza con l'attività; grave: impedisce l'attività quotidiana; grado 4: visita al pronto soccorso o ricovero in ospedale per forte dolore muscolare o forte dolore alle articolazioni*

Lieve ☐

Nessuno ☐

Grado 4 ☐

Grave ☐

Moderato ☐

**C34.**

### Hai avuto mialgie/artralgie?

#### Giorno 6

*Lieve: non interferisce con l'attività; moderato: una limitata interferenza con l'attività; grave: impedisce l'attività quotidiana; grado 4: visita al pronto soccorso o ricovero in ospedale per forte dolore muscolare o forte dolore alle articolazioni*

Lieve ☐

Nessuno ☐

Grado 4 ☐

Grave ☐

Moderato ☐

**C35.**

### Hai avuto mialgie/artralgie?

#### Giorno 7

*Lieve: non interferisce con l'attività; moderato: una limitata interferenza con l'attività; grave: impedisce l'attività quotidiana; grado 4: visita al pronto soccorso o ricovero in ospedale per forte dolore muscolare o forte dolore alle articolazioni*

Lieve ☐

Nessuno ☐

Grado 4 ☐

Grave ☐

Moderato ☐

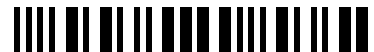

**C36.**

### Hai avuto sintomi gastrointestinali?

#### Giorno 1

*Lieve: vomitare 1 o 2 volte in 24 ore e/o 2 o 3 feci molle in 24 ore; moderato: vomitare >2 volte in 24 ore e/o 4 o 5 feci molle in 24 ore; grave: richiede idratazione endovenosa e/o 6 o più feci molle in 24 ore; grado 4: visita al pronto soccorso o ricovero ospedaliero*

Grado 4 ☐

Grave ☐

Moderato ☐

Lieve ☐

Nessuno ☐

**C37.**

### Hai avuto sintomi gastrointestinali?

#### Giorno 2

*Lieve: vomitare 1 o 2 volte in 24 ore e/o 2 o 3 feci molle in 24 ore; moderato: vomitare >2 volte in 24 ore e/o 4 o 5 feci molle in 24 ore; grave: richiede idratazione endovenosa e/o 6 o più feci molle in 24 ore; grado 4: visita al pronto soccorso o ricovero ospedaliero*

Grado 4 ☐

Grave ☐

Moderato ☐

Lieve ☐

Nessuno ☐

**C38.**

### Hai avuto sintomi gastrointestinali?

#### Giorno 3

*Lieve: vomitare 1 o 2 volte in 24 ore e/o 2 o 3 feci molle in 24 ore; moderato: vomitare >2 volte in 24 ore e/o 4 o 5 feci molle in 24 ore; grave: richiede idratazione endovenosa e/o 6 o più feci molle in 24 ore; grado 4: visita al pronto soccorso o ricovero ospedaliero*

Grado 4 ☐

Grave ☐

Moderato ☐

Lieve ☐

Nessuno ☐

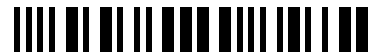

**C39.**

### Hai avuto sintomi gastrointestinali?

#### Giorno 4

*Lieve: vomitare 1 o 2 volte in 24 ore e/o 2 o 3 feci molle in 24 ore; moderato: vomitare >2 volte in 24 ore e/o 4 o 5 feci molle in 24 ore; grave: richiede idratazione endovenosa e/o 6 o più feci molle in 24 ore; grado 4: visita al pronto soccorso o ricovero ospedaliero*

Grado 4 ☐

Grave ☐

Moderato ☐

Lieve ☐

Nessuno ☐

**C40.**

### Hai avuto sintomi gastrointestinali?

#### Giorno 5

*Lieve: vomitare 1 o 2 volte in 24 ore e/o 2 o 3 feci molle in 24 ore; moderato: vomitare >2 volte in 24 ore e/o 4 o 5 feci molle in 24 ore; grave: richiede idratazione endovenosa e/o 6 o più feci molle in 24 ore; grado 4: visita al pronto soccorso o ricovero ospedaliero*

Grado 4 ☐

Grave ☐

Moderato ☐

Lieve ☐

Nessuno ☐

**C41.**

### Hai avuto sintomi gastrointestinali?

#### Giorno 6

*Lieve: vomitare 1 o 2 volte in 24 ore e/o 2 o 3 feci molle in 24 ore; moderato: vomitare >2 volte in 24 ore e/o 4 o 5 feci molle in 24 ore; grave: richiede idratazione endovenosa e/o 6 o più feci molle in 24 ore; grado 4: visita al pronto soccorso o ricovero ospedaliero*

Grado 4 ☐

Grave ☐

Moderato ☐

Lieve ☐

Nessuno ☐

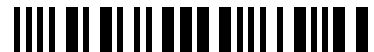

**C42.**

**Hai avuto sintomi gastrointestinali?**

**Giorno 7**

*Lieve: vomitare 1 o 2 volte in 24 ore e/o 2 o 3 feci molle in 24 ore; moderato: vomitare >2 volte in 24 ore e/o 4 o 5 feci molle in 24 ore; grave: richiede idratazione endovenosa e/o 6 o più feci molle in 24 ore; grado 4: visita al pronto soccorso o ricovero ospedaliero*

Grado 4 ☐

Grave ☐

Moderato ☐

Lieve ☐

Nessuno ☐

**C43.**

**Hai utilizzato farmaci antipiretici o antidolorifici?**

**Giorno 1**

No ☐

Sì ☐

**C44.**

**Hai utilizzato farmaci antipiretici o antidolorifici?**

**Giorno 2**

No ☐

Sì ☐

**C45.**

**Hai utilizzato farmaci antipiretici o antidolorifici?**

**Giorno 3**

No ☐

Sì ☐

**C46.**

**Hai utilizzato farmaci antipiretici o antidolorifici?**

**Giorno 4**

No ☐

Sì ☐

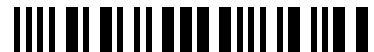

**C47.**

**Hai utilizzato farmaci antipiretici o antidolorifici?**

**Giorno 5**

No ☐

Si ☐

**C48.**

**Hai utilizzato farmaci antipiretici o antidolorifici?**

**Giorno 6**

No ☐

Si ☐

**C49.**

**Hai utilizzato farmaci antipiretici o antidolorifici?**

**Giorno 7**

No ☐

Si ☐

## **Sezione D: Sezione 2 - Vaccino COVID-19 mRNA: EVENTI AVVERSI RARI**

**D1.**

**Hai avuto linfadenomegalia?**

**Giorno 1**

No ☐

Si ☐

**D2.**

**Hai avuto linfadenomegalia?**

**Giorno 2**

No ☐

Si ☐

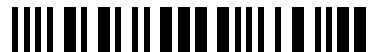

**D3.**

**Hai avuto linfadenomegalia?**

**Giorno 3**

No ☐

Sì ☐

**D4.**

**Hai avuto linfadenomegalia?**

**Giorno 4**

No ☐

Sì ☐

**D5.**

**Hai avuto linfadenomegalia?**

**Giorno 5**

No ☐

Sì ☐

**D6.**

**Hai avuto linfadenomegalia?**

**Giorno 6**

No ☐

Sì ☐

**D7.**

**Hai avuto linfadenomegalia?**

**Giorno 7**

No ☐

Sì ☐

**D8.**

**Hai avuto sintomi a carico del sistema nervoso?**

**Giorno 1**

Sì ☐

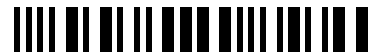
No ☐
**D9.**
**Hai avuto sintomi a carico del sistema nervoso?**
**Giorno 2**

Sì ☐

No ☐
**D10.**
**Hai avuto sintomi a carico del sistema nervoso?**
**Giorno 3**

Sì ☐

No ☐
**D11.**
**Hai avuto sintomi a carico del sistema nervoso?**
**Giorno 4**

Sì ☐

No ☐
**D12.**
**Hai avuto sintomi a carico del sistema nervoso?**
**Giorno 5**

Sì ☐

No ☐
**D13.**
**Hai avuto sintomi a carico del sistema nervoso?**
**Giorno 6**

Sì ☐

No ☐



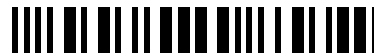

**D14.**

**Hai avuto sintomi a carico del sistema nervoso?**

**Giorno 7**

Sì ☐

No ☐

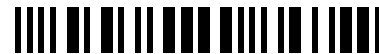

**IMPORTANTE:** In caso di comparsa di reazioni insorte in periodo successivo ai 7 giorni dalla vaccinazione e/o di altre manifestazioni cliniche non ricomprese tra quelle precedentemente riportate a partire dal giorno dell'immunizzazione, si prega di contattare il Servizio di Sorveglianza Sanitaria del personale universitario.

**I Servizi di Sorveglianza Sanitaria-Medicina del Lavoro e di Igiene di UniGe restano a completa disposizione, per quanto di competenza, per continuare a garantire l'attività d'informazione e consulenza.**

### **Contatti**

**Servizio di Sorveglianza Sanitaria di Ateneo-Medicina del Lavoro Largo Rosanna Benzi 10, 16132 Genova Padiglione 3 Email:  
uos.sorveglianzasanitaria2@hsanmartino.it - sorvsanitaria@unige.it**

**Medici Specialisti e Medici Competenti: Prof. Paolo Durando - durando@unige.it;  
Dott.ssa Nicoletta Debarbieri - nicoletta.debarbieri@hsanmartino.it; Prof. Guglielmo Dini - guglielmo.dini@unige.it**

**Servizio di Igiene Largo Rosanna Benzi 10, 16132 Genova Padiglione 3 Email:  
igiene.segreteria@hsanmartino.it - ambulatorio.vaccinazioni@hsanmartino.it**

**Medici Specialisti: Prof. Giancarlo Icardi - icardi@unige.it; Dott.ssa Bianca Bruzzone - bianca.bruzzone@hsanmartino.it; Prof. Andrea Orsi - andrea.orsi@unige.it;  
Prof.ssa Laura Sticchi - laura.sticchi@unige.it**

**Grazie per aver partecipato all'indagine.**
