# Supplementary material for: Reactogenicity of BNT162b2 mRNA COVID-19 Vaccine in a Young Working Age Population: A Survey among Medical School Residents, within a Mass Vaccination Campaign, in a Regional Reference Teaching Hospital in Italy
Source: MDPI journal article supplement (doi:10.3390/vaccines9111269), 2021-11-03
Supplement: s1 [file s1]

**This questionnaire is designed to investigate local and systemic reactions following the COVID-19 mRNA vaccination. The participant is requested to carefully complete the questionnaire within 7 days after the vaccination. These data are very important to research during the vaccination campaign in Italy. Please fill in the questionnaire daily, and select only one answer for each day. The questionnaire can be saved, resumed and modified until it is submitted by the participant or until the deadline.**

### **Section A: Section 1 – Demographics**

A1. First and last name:

A2. Gender: Female/Male/Non-binary

A3. Age: years

### **Section B: Section 2 - COVID-19 mRNA Vaccine: LOCAL EFFECTS**

B1. Did you have redness at the injection site? Day 1: none / mild, >2.0 to 5.0 cm / moderate, >5.0 to 10.0 cm / severe, >10.0 cm / Grade4, Necrosis or exfoliative dermatitis

B2. Did you have redness at the injection site? Day 2: none / mild, >2.0 to 5.0 cm / moderate, >5.0 to 10.0 cm / severe, >10.0 cm / Grade4, Necrosis or exfoliative dermatitis

B3. Did you have redness at the injection site? Day 3: none / mild, >2.0 to 5.0 cm / moderate, >5.0 to 10.0 cm / severe, >10.0 cm / Grade4, Necrosis or exfoliative dermatitis

B4. Did you have redness at the injection site? Day 4: none / mild, >2.0 to 5.0 cm / moderate, >5.0 to 10.0 cm / severe, >10.0 cm / Grade4, Necrosis or exfoliative dermatitis

B5. Did you have redness at the injection site? Day 5: none / mild, >2.0 to 5.0 cm / moderate, >5.0 to 10.0 cm / severe, >10.0 cm / Grade4, Necrosis or exfoliative dermatitis

B6. Did you have redness at the injection site? Day 6: none / mild, >2.0 to 5.0 cm / moderate, >5.0 to 10.0 cm / severe, >10.0 cm / Grade4, Necrosis or exfoliative dermatitis

B7. Did you have redness at the injection site? Day 7: none / mild, >2.0 to 5.0 cm / moderate, >5.0 to 10.0 cm / severe, >10.0 cm / Grade4, Necrosis or exfoliative dermatitis

B8. Did you have swelling at the injection site? Day 1: none / mild, >2.0 to 5.0 cm / moderate, >5.0 to 10.0 cm / severe, >10.0 cm / Grade4, Necrosis

B9. Did you have swelling at the injection site? Day 2: none / mild, >2.0 to 5.0 cm / moderate, >5.0 to 10.0 cm / severe, >10.0 cm / Grade4, Necrosis

B10. Did you have swelling at the injection site? Day 3: none / mild, >2.0 to 5.0 cm / moderate, >5.0 to 10.0 cm / severe, >10.0 cm / Grade4, Necrosis

B11. Did you have swelling at the injection site? Day 4: none / mild, >2.0 to 5.0 cm / moderate, >5.0 to 10.0 cm / severe, >10.0 cm / Grade4, Necrosis

B12. Did you have swelling at the injection site? Day 5: none / mild, >2.0 to 5.0 cm / moderate, >5.0 to 10.0 cm / severe, >10.0 cm / Grade4, Necrosis

B13. Did you have swelling at the injection site? Day 6: none / mild, >2.0 to 5.0 cm / moderate, >5.0 to 10.0 cm / severe, >10.0 cm / Grade4, Necrosis

B14. Did you have swelling at the injection site? Day 7: none / mild, >2.0 to 5.0 cm / moderate, >5.0 to 10.0 cm / severe, >10.0 cm / Grade4, Necrosis

B15. Did you have pain at the injection site? Day 1: none / mild, does not interfere with activity / moderate, some interference with activity / severe, prevents daily activity / Grade4, Emergency room visit or hospitalization for severe pain at the injection site

B16. Did you have pain at the injection site? Day 2: none / mild, does not interfere with activity / moderate, some interference with activity / severe, prevents daily activity / Grade4, Emergency room visit or hospitalization for severe pain at the injection site

|                                                                                                                                                                                                                                                                                   |
|-----------------------------------------------------------------------------------------------------------------------------------------------------------------------------------------------------------------------------------------------------------------------------------|
| B17. Did you have pain at the injection site? Day 3: none / mild, does not interfere with activity / moderate, some interference with activity / severe, prevents daily activity / Grade4, Emergency room visit or hospitalization for severe pain at the injection site          |
| B18. Did you have pain at the injection site? Day 4: none / mild, does not interfere with activity / moderate, some interference with activity / severe, prevents daily activity / Grade4, Emergency room visit or hospitalization for severe pain at the injection site          |
| B19. Did you have pain at the injection site? Day 5: none / mild, does not interfere with activity / moderate, some interference with activity / severe, prevents daily activity / Grade4, Emergency room visit or hospitalization for severe pain at the injection site          |
| B20. Did you have pain at the injection site? Day 6: none / mild, does not interfere with activity / moderate, some interference with activity / severe, prevents daily activity / Grade4, Emergency room visit or hospitalization for severe pain at the injection site          |
| B21. Did you have pain at the injection site? Day 7: none / mild, does not interfere with activity / moderate, some interference with activity / severe, prevents daily activity / Grade4, Emergency room visit or hospitalization for severe pain at the injection site          |
| <b>Section C: Section 2 - COVID-19 mRNA Vaccine: SYSTEMIC EFFECTS</b>                                                                                                                                                                                                             |
| C1. Did you have a fever? Day 1: no / $\geq 37.5^{\circ}\text{C}$ to $38.0^{\circ}\text{C}$ / $>38.0^{\circ}\text{C}$ to $38.5^{\circ}\text{C}$ / $>38.5^{\circ}\text{C}$ to $39.0^{\circ}\text{C}$ / $>39.0^{\circ}\text{C}$ to $40.0^{\circ}\text{C}$ / $>40.0^{\circ}\text{C}$ |
| C2. Did you have a fever? Day 2: no / $\geq 37.5^{\circ}\text{C}$ to $38.0^{\circ}\text{C}$ / $>38.0^{\circ}\text{C}$ to $38.5^{\circ}\text{C}$ / $>38.5^{\circ}\text{C}$ to $39.0^{\circ}\text{C}$ / $>39.0^{\circ}\text{C}$ to $40.0^{\circ}\text{C}$ / $>40.0^{\circ}\text{C}$ |
| C3. Did you have a fever? Day 3: no / $\geq 37.5^{\circ}\text{C}$ to $38.0^{\circ}\text{C}$ / $>38.0^{\circ}\text{C}$ to $38.5^{\circ}\text{C}$ / $>38.5^{\circ}\text{C}$ to $39.0^{\circ}\text{C}$ / $>39.0^{\circ}\text{C}$ to $40.0^{\circ}\text{C}$ / $>40.0^{\circ}\text{C}$ |
| C4. Did you have a fever? Day 4: no / $\geq 37.5^{\circ}\text{C}$ to $38.0^{\circ}\text{C}$ / $>38.0^{\circ}\text{C}$ to $38.5^{\circ}\text{C}$ / $>38.5^{\circ}\text{C}$ to $39.0^{\circ}\text{C}$ / $>39.0^{\circ}\text{C}$ to $40.0^{\circ}\text{C}$ / $>40.0^{\circ}\text{C}$ |
| C5. Did you have a fever? Day 5: no / $\geq 37.5^{\circ}\text{C}$ to $38.0^{\circ}\text{C}$ / $>38.0^{\circ}\text{C}$ to $38.5^{\circ}\text{C}$ / $>38.5^{\circ}\text{C}$ to $39.0^{\circ}\text{C}$ / $>39.0^{\circ}\text{C}$ to $40.0^{\circ}\text{C}$ / $>40.0^{\circ}\text{C}$ |
| C6. Did you have a fever? Day 6: no / $\geq 37.5^{\circ}\text{C}$ to $38.0^{\circ}\text{C}$ / $>38.0^{\circ}\text{C}$ to $38.5^{\circ}\text{C}$ / $>38.5^{\circ}\text{C}$ to $39.0^{\circ}\text{C}$ / $>39.0^{\circ}\text{C}$ to $40.0^{\circ}\text{C}$ / $>40.0^{\circ}\text{C}$ |
| C7. Did you have a fever? Day 7: no / $\geq 37.5^{\circ}\text{C}$ to $38.0^{\circ}\text{C}$ / $>38.0^{\circ}\text{C}$ to $38.5^{\circ}\text{C}$ / $>38.5^{\circ}\text{C}$ to $39.0^{\circ}\text{C}$ / $>39.0^{\circ}\text{C}$ to $40.0^{\circ}\text{C}$ / $>40.0^{\circ}\text{C}$ |
| C8. Did you experience fatigue? Day 1: none / mild, does not interfere with activity / moderate, some interference with activity / severe, prevents daily activity / Grade4, Emergency room visit or hospitalization for severe fatigue                                           |
| C9. Did you experience fatigue? Day 2: none / mild, does not interfere with activity / moderate, some interference with activity / severe, prevents daily activity / Grade4, Emergency room visit or hospitalization for severe fatigue                                           |
| C10. Did you experience fatigue? Day 3: none / mild, does not interfere with activity / moderate, some interference with activity / severe, prevents daily activity / Grade4, Emergency room visit or hospitalization for severe fatigue                                          |
| C11. Did you experience fatigue? Day 4: none / mild, does not interfere with activity / moderate, some interference with activity / severe, prevents daily activity / Grade4, Emergency room visit or hospitalization for severe fatigue                                          |
| C12. Did you experience fatigue? Day 5: none / mild, does not interfere with activity / moderate, some interference with activity / severe, prevents daily activity / Grade4, Emergency room visit or hospitalization for severe fatigue                                          |
| C13. Did you experience fatigue? Day 6: none / mild, does not interfere with activity / moderate, some interference with activity / severe, prevents daily activity / Grade4, Emergency room visit or hospitalization for severe fatigue                                          |

|                                                                                                                                                                                                                                                            |
|------------------------------------------------------------------------------------------------------------------------------------------------------------------------------------------------------------------------------------------------------------|
| C14. Did you experience fatigue? Day 7: none / mild, does not interfere with activity / moderate, some interference with activity / severe, prevents daily activity / Grade4, Emergency room visit or hospitalization for severe fatigue                   |
| C15. Did you have chills? Day 1: no / yes                                                                                                                                                                                                                  |
| C16. Did you have chills? Day 2: no / yes                                                                                                                                                                                                                  |
| C17. Did you have chills? Day 3: no / yes                                                                                                                                                                                                                  |
| C18. Did you have chills? Day 4: no / yes                                                                                                                                                                                                                  |
| C19. Did you have chills? Day 5: no / yes                                                                                                                                                                                                                  |
| C20. Did you have chills? Day 6: no / yes                                                                                                                                                                                                                  |
| C21. Did you have chills? Day 7: no / yes                                                                                                                                                                                                                  |
| C22. Have you had a headache? Day 1: none / mild, does not interfere with activity / moderate, some interference with activity / severe, prevents daily activity / Grade4, Emergency room visit or hospitalization for severe headache                     |
| C23. Have you had a headache? Day 2: none / mild, does not interfere with activity / moderate, some interference with activity / severe, prevents daily activity / Grade4, Emergency room visit or hospitalization for severe headache                     |
| C24. Have you had a headache? Day 3: none / mild, does not interfere with activity / moderate, some interference with activity / severe, prevents daily activity / Grade4, Emergency room visit or hospitalization for severe headache                     |
| C25. Have you had a headache? Day 4: none / mild, does not interfere with activity / moderate, some interference with activity / severe, prevents daily activity / Grade4, Emergency room visit or hospitalization for severe headache                     |
| C26. Have you had a headache? Day 5: none / mild, does not interfere with activity / moderate, some interference with activity / severe, prevents daily activity / Grade4, Emergency room visit or hospitalization for severe headache                     |
| C27. Have you had a headache? Day 6: none / mild, does not interfere with activity / moderate, some interference with activity / severe, prevents daily activity / Grade4, Emergency room visit or hospitalization for severe headache                     |
| C28. Have you had a headache? Day 7: none / mild, does not interfere with activity / moderate, some interference with activity / severe, prevents daily activity / Grade4, Emergency room visit or hospitalization for severe headache                     |
| C29. Have you had any muscle/joint pain? Day 1: none / mild, does not interfere with activity / moderate, some interference with activity / severe, prevents daily activity / Grade4, Emergency room visit or hospitalization for severe muscle/joint pain |
| C30. Have you had any muscle/joint pain? Day 2: none / mild, does not interfere with activity / moderate, some interference with activity / severe, prevents daily activity / Grade4, Emergency room visit or hospitalization for severe muscle/joint pain |
| C31. Have you had any muscle/joint pain? Day 3: none / mild, does not interfere with activity / moderate, some interference with activity / severe, prevents daily activity / Grade4, Emergency room visit or hospitalization for severe muscle/joint pain |
| C32. Have you had any muscle/joint pain? Day 4: none / mild, does not interfere with activity / moderate, some interference with activity / severe, prevents daily activity / Grade4, Emergency room visit or hospitalization for severe muscle/joint pain |
| C33. Have you had any muscle/joint pain? Day 5: none / mild, does not interfere with activity / moderate, some interference with activity / severe, prevents daily activity / Grade4, Emergency room visit or hospitalization for severe muscle/joint pain |
| C34. Have you had any muscle/joint pain? Day 6: none / mild, does not interfere with activity / moderate, some interference with activity / severe, prevents daily activity / Grade4, Emergency room visit or hospitalization for severe muscle/joint pain |

|                                                                                                                                                                                                                                                                                                                                                                       |
|-----------------------------------------------------------------------------------------------------------------------------------------------------------------------------------------------------------------------------------------------------------------------------------------------------------------------------------------------------------------------|
| C35. Have you had any muscle/joint pain? Day 7: none / mild, does not interfere with activity / moderate, some interference with activity / severe, prevents daily activity / Grade4, Emergency room visit or hospitalization for severe muscle/joint pain                                                                                                            |
| C36. Have you had any gastrointestinal symptoms? Day 1: none / mild, emesis 1 or 2 times and-or 2 or 3 loose stools in 24 hours / moderate, emesis >2 times and-or 4 or 5 loose stools in 24 hours / severe, requiring intravenous hydration and-or ≥6 loose stools in 24 hours / Grade4, emergency room visit or hospitalization for severe vomiting and/or diarrhea |
| C37. Have you had any gastrointestinal symptoms? Day 2: none / mild, emesis 1 or 2 times and-or 2 or 3 loose stools in 24 hours / moderate, emesis >2 times and-or 4 or 5 loose stools in 24 hours / severe, requiring intravenous hydration and-or ≥6 loose stools in 24 hours / Grade4, emergency room visit or hospitalization for severe vomiting and/or diarrhea |
| C38. Have you had any gastrointestinal symptoms? Day 3: none / mild, emesis 1 or 2 times and-or 2 or 3 loose stools in 24 hours / moderate, emesis >2 times and-or 4 or 5 loose stools in 24 hours / severe, requiring intravenous hydration and-or ≥6 loose stools in 24 hours / Grade4, emergency room visit or hospitalization for severe vomiting and/or diarrhea |
| C39. Have you had any gastrointestinal symptoms? Day 4: none / mild, emesis 1 or 2 times and-or 2 or 3 loose stools in 24 hours / moderate, emesis >2 times and-or 4 or 5 loose stools in 24 hours / severe, requiring intravenous hydration and-or ≥6 loose stools in 24 hours / Grade4, emergency room visit or hospitalization for severe vomiting and/or diarrhea |
| C40. Have you had any gastrointestinal symptoms? Day 5: none / mild, emesis 1 or 2 times and-or 2 or 3 loose stools in 24 hours / moderate, emesis >2 times and-or 4 or 5 loose stools in 24 hours / severe, requiring intravenous hydration and-or ≥6 loose stools in 24 hours / Grade4, emergency room visit or hospitalization for severe vomiting and/or diarrhea |
| C41. Have you had any gastrointestinal symptoms? Day 6: none / mild, emesis 1 or 2 times and-or 2 or 3 loose stools in 24 hours / moderate, emesis >2 times and-or 4 or 5 loose stools in 24 hours / severe, requiring intravenous hydration and-or ≥6 loose stools in 24 hours / Grade4, emergency room visit or hospitalization for severe vomiting and/or diarrhea |
| C42. Have you had any gastrointestinal symptoms? Day 7: none / mild, emesis 1 or 2 times and-or 2 or 3 loose stools in 24 hours / moderate, emesis >2 times and-or 4 or 5 loose stools in 24 hours / severe, requiring intravenous hydration and-or ≥6 loose stools in 24 hours / Grade4, emergency room visit or hospitalization for severe vomiting and/or diarrhea |
| C43. Did you use antipyretics / NSAIDs? Day 1: no / yes                                                                                                                                                                                                                                                                                                               |
| C44. Did you use antipyretics / NSAIDs? Day 2: no / yes                                                                                                                                                                                                                                                                                                               |
| C45. Did you use antipyretics / NSAIDs? Day 3: no / yes                                                                                                                                                                                                                                                                                                               |
| C46. Did you use antipyretics / NSAIDs? Day 4: no / yes                                                                                                                                                                                                                                                                                                               |
| C47. Did you use antipyretics / NSAIDs? Day 5: no / yes                                                                                                                                                                                                                                                                                                               |
| C48. Did you use antipyretics / NSAIDs? Day 6: no / yes                                                                                                                                                                                                                                                                                                               |
| C49. Did you use antipyretics / NSAIDs? Day 7: no / yes                                                                                                                                                                                                                                                                                                               |
| <b>Section D: Section 2 - COVID-19 mRNA Vaccine: RARE ADVERSE EVENTS</b>                                                                                                                                                                                                                                                                                              |
| D1. Did you have any enlargement of the lymph nodes? Day 1: no / yes                                                                                                                                                                                                                                                                                                  |
| D2. Did you have any enlargement of the lymph nodes? Day 2: no / yes                                                                                                                                                                                                                                                                                                  |
| D3. Did you have any enlargement of the lymph nodes? Day 3: no / yes                                                                                                                                                                                                                                                                                                  |
| D4. Did you have any enlargement of the lymph nodes? Day 4: no / yes                                                                                                                                                                                                                                                                                                  |
| D5. Did you have any enlargement of the lymph nodes? Day 5: no / yes                                                                                                                                                                                                                                                                                                  |
| D6. Did you have any enlargement of the lymph nodes? Day 6: no / yes                                                                                                                                                                                                                                                                                                  |
| D7. Did you have any enlargement of the lymph nodes? Day 7: no / yes                                                                                                                                                                                                                                                                                                  |
| D8. Have you had any symptoms affecting your nervous system? Day 1: no / yes                                                                                                                                                                                                                                                                                          |
| D9. Have you had any symptoms affecting your nervous system? Day 2: no / yes                                                                                                                                                                                                                                                                                          |

|                                                                                                                                                                                                                                                                                                                                                                                                                                                                                                               |
|---------------------------------------------------------------------------------------------------------------------------------------------------------------------------------------------------------------------------------------------------------------------------------------------------------------------------------------------------------------------------------------------------------------------------------------------------------------------------------------------------------------|
| D10. Have you had any symptoms affecting your nervous system? Day 3: no / yes                                                                                                                                                                                                                                                                                                                                                                                                                                 |
| D11. Have you had any symptoms affecting your nervous system? Day 4: no / yes                                                                                                                                                                                                                                                                                                                                                                                                                                 |
| D12. Have you had any symptoms affecting your nervous system? Day 5: no / yes                                                                                                                                                                                                                                                                                                                                                                                                                                 |
| D13. Have you had any symptoms affecting your nervous system? Day 6: no / yes                                                                                                                                                                                                                                                                                                                                                                                                                                 |
| D14. Have you had any symptoms affecting your nervous system? Day 7: no / yes                                                                                                                                                                                                                                                                                                                                                                                                                                 |
| <p>IMPORTANT: In the event of reactions occurring after 7 days from vaccination and/or clinical manifestations not included among those previously reported, please contact the Health Surveillance Service of the University.</p> <p>The Health Surveillance Service - Occupational Medicine Unit, and the Hygiene Unit of the University of Genova remain at your complete disposal, for any information and counselling.</p> <p>Contacts</p> <p>...</p> <p>Thank you for participating in this survey.</p> |
